# Supplementary material
Source: MDPI journal article supplement (https://www.mdpi.com/2073-4395/13/1/38)
Supplement: s1 [file s1]

# Supplementary Material

## 1 Supplementary Figures and Tables

### 1.1 Supplementary Figures

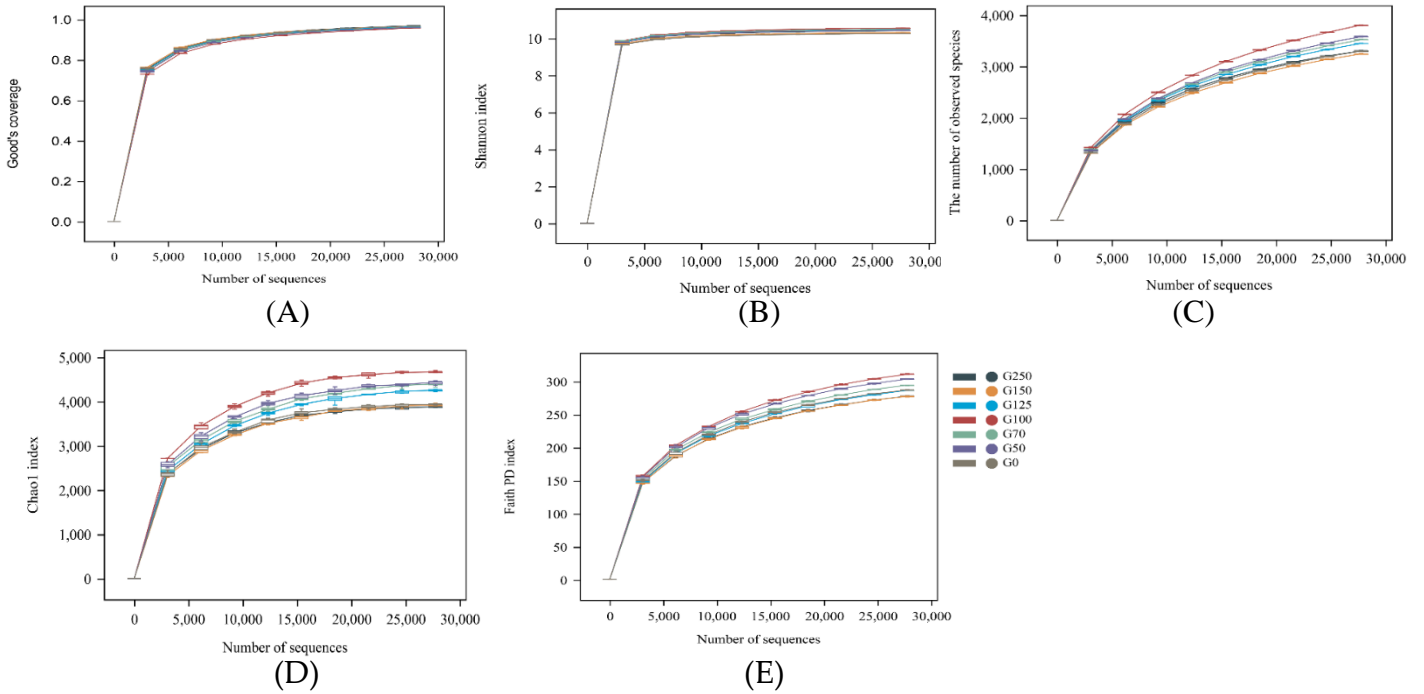

**Figure S1.** Rarefaction curves of ASVs. (A-E) Rarefaction curves at Good's coverage, Shannon, observed species richness, Chao1 and Faith PD indices level, respectively.

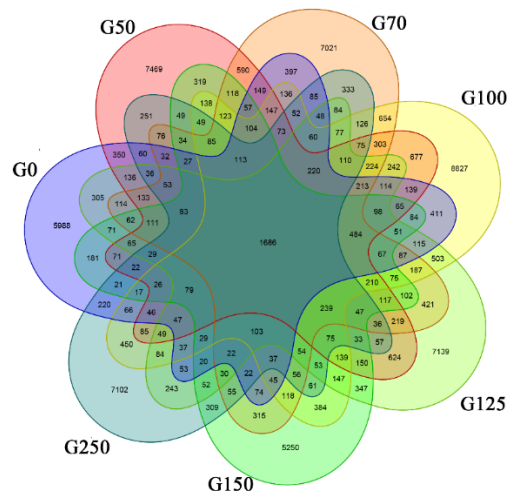

**Figure S2.** The Venn diagram of ASVs at different-sized forest gaps.

## 1.2 Supplementary Tables

**Table S1.** Analysis of similarities (ANOSIM) and permutational multivariate analysis of variance (PERMANOVA) based on weighted Unifrac distance at different gap size gradients

| Group1 | Group2 | F     | P     | R <sup>2</sup> |
|--------|--------|-------|-------|----------------|
| all    | -      | 1.736 | 0.001 | 0.173          |
| G250   | G150   | 2.398 | 0.021 | 0.270          |
| G250   | G125   | 3.640 | 0.003 | 0.442          |
| G250   | G100   | 1.296 | 0.029 | 0.216          |
| G250   | G70    | 2.516 | 0.02  | 0.304          |
| G250   | G50    | 1.911 | 0.047 | 0.183          |
| G250   | G0     | 1.465 | 0.28  | 0.043          |
| G150   | G125   | 1.330 | 0.077 | 0.192          |
| G150   | G100   | 1.963 | 0.02  | 0.304          |
| G150   | G70    | 1.203 | 0.106 | 0.144          |
| G150   | G50    | 1.039 | 0.326 | 0.024          |
| G150   | G0     | 1.288 | 0.107 | 0.120          |
| G125   | G100   | 3.310 | 0.001 | 0.391          |
| G125   | G70    | 1.830 | 0.03  | 0.210          |
| G125   | G50    | 1.609 | 0.174 | 0.069          |
| G125   | G0     | 1.570 | 0.018 | 0.240          |
| G100   | G70    | 1.895 | 0.035 | 0.196          |
| G100   | G50    | 0.924 | 0.428 | 0.002          |
| G100   | G0     | 1.724 | 0.033 | 0.223          |
| G70    | G50    | 0.937 | 0.504 | 0.014          |
| G70    | G0     | 1.193 | 0.064 | 0.165          |
| G50    | G0     | 1.315 | 0.128 | 0.097          |

Note: the explanation degree(R<sup>2</sup>) and significance degree (P) of the grouping scheme are calculated on the weighted Unifrac distance matrix, with the number of permutation tests set to 999.

**Table S2.** Topological characteristics of co-occurrence networks of soil bacteria community in forest gaps and closed forests

| <b>Network properties</b> | <b>G250</b>     | <b>G150</b>     | <b>G125</b>     | <b>G100</b>     | <b>G70</b>      | <b>G50</b>      | <b>G0</b>       |
|---------------------------|-----------------|-----------------|-----------------|-----------------|-----------------|-----------------|-----------------|
| <b>Total nodes</b>        | 98              | 97              | 100             | 100             | 100             | 100             | 99              |
| <b>Total edges</b>        | 529             | 344             | 433             | 330             | 344             | 464             | 326             |
| <b>Positive edges</b>     | 318<br>(60.11%) | 198<br>(58.43%) | 251<br>(57.97%) | 187<br>(56.67%) | 189<br>(56.98%) | 255<br>(54.96%) | 200<br>(61.35%) |
| <b>Negative edges</b>     | 211<br>(39.89%) | 143<br>(41.57%) | 182<br>(42.03%) | 143<br>(43.33%) | 155<br>(45.02%) | 209<br>(45.04%) | 126<br>(38.65%) |
| <b>AD</b>                 | 10.796          | 7.093           | 8.66            | 8.6             | 7.88            | 9.28            | 6.586           |
| <b>Diameter</b>           | 6               | 9               | 8               | 8               | 8               | 8               | 8               |
| <b>Density</b>            | 0.111           | 0.074           | 0.087           | 0.068           | 0.069           | 0.094           | 0.067           |
| <b>Modularity</b>         | 0.481           | 0.588           | 0.447           | 0.571           | 0.535           | 0.462           | 0.604           |
| <b>ACC</b>                | 0.514           | 0.499           | 0.402           | 0.407           | 0.383           | 0.447           | 0.45            |
| <b>No. modules</b>        | 4               | 8               | 7               | 7               | 6               | 6               | 7               |
| <b>APL</b>                | 2.804           | 3.418           | 2.992           | 3.267           | 3.063           | 2.872           | 3.514           |
| <b>N/P cohesion</b>       | 66.35%          | 72.22%          | 72.51%          | 76.47%          | 82.01%          | 81.96%          | 61.35%          |

Note: AD, average degree; ACC, average clustering coefficient; APL, average path length; N/P cohesion, negative and positive connection proportions; No. modules, number of modules.

**Table S3.** Percent variance explained of the composition of soil bacterial community by each gap-related microenvironmental factor.

| <b>Factors</b> | <b>Explains %</b> | <b>Contribution %</b> | <b>pseudo-F</b> | <b>P</b>     |
|----------------|-------------------|-----------------------|-----------------|--------------|
| <b>AP</b>      | <b>6.5</b>        | <b>12</b>             | <b>3.3</b>      | <b>0.014</b> |
| <b>ATH</b>     | <b>4.9</b>        | <b>9.1</b>            | <b>2.7</b>      | <b>0.034</b> |
| <b>Utot</b>    | <b>4.5</b>        | <b>8.3</b>            | <b>2.6</b>      | <b>0.034</b> |
| <b>LAI</b>     | <b>4.8</b>        | <b>8.9</b>            | <b>2.6</b>      | <b>0.05</b>  |
| GapSize        | 4.2               | 7.7                   | 2.4             | 0.084        |
| AK             | 3.1               | 5.8                   | 2               | 0.102        |
| INV            | 2.8               | 5.2                   | 1.8             | 0.154        |
| SOM            | 3                 | 5.4                   | 1.8             | 0.158        |
| Udif           | 2.2               | 4.1                   | 1.5             | 0.172        |
| ST             | 2.6               | 4.8                   | 1.5             | 0.178        |
| AN             | 2.6               | 4.7                   | 1.6             | 0.182        |
| PHO            | 2                 | 3.6                   | 1.3             | 0.29         |
| Udir           | 1.6               | 3                     | 1.1             | 0.31         |
| ReD            | 1.7               | 3.2                   | 1.1             | 0.342        |
| SW             | 1.8               | 3.3                   | 1.2             | 0.348        |
| CO             | 1.6               | 2.9                   | 1               | 0.376        |
| EC             | 1.6               | 3                     | 1.1             | 0.402        |

|      |     |     |     |       |
|------|-----|-----|-----|-------|
| RLA  | 1.1 | 2.1 | 0.7 | 0.548 |
| ADBH | 0.8 | 1.5 | 0.5 | 0.706 |
| URE  | 0.8 | 1.4 | 0.5 | 0.766 |

**Table S4.** Percent variance explained of the diversity and network structure of soil bacterial community by each gap-related microenvironmental factor.

| Factors        | Explains %  | Contribution % | pseudo-F    | P            |
|----------------|-------------|----------------|-------------|--------------|
| <b>ReD</b>     | <b>15.9</b> | <b>22.8</b>    | <b>9.1</b>  | <b>0.002</b> |
| <b>GapSize</b> | <b>16.8</b> | <b>24.2</b>    | <b>11.7</b> | <b>0.002</b> |
| <b>LAI</b>     | <b>7.6</b>  | <b>10.9</b>    | <b>5.8</b>  | <b>0.008</b> |
| <b>RLA</b>     | <b>4.2</b>  | <b>6</b>       | <b>3.4</b>  | <b>0.012</b> |
| <b>ATH</b>     | <b>3</b>    | <b>4.3</b>     | <b>2.8</b>  | <b>0.044</b> |
| SW             | 3.4         | 4.9            | 2.9         | 0.062        |
| ST             | 2.3         | 3.3            | 2.2         | 0.082        |
| EC             | 2.6         | 3.7            | 2.2         | 0.084        |
| ADBH           | 2           | 2.9            | 1.8         | 0.148        |
| AK             | 1.7         | 2.4            | 1.6         | 0.188        |
| Utot           | 1.8         | 2.5            | 1.7         | 0.208        |
| CO             | 1.4         | 2.1            | 1.4         | 0.236        |
| AP             | 1.3         | 1.9            | 1.3         | 0.268        |
| INV            | 1.2         | 1.7            | 1.2         | 0.324        |
| SOM            | 1.1         | 1.6            | 1.1         | 0.336        |
| AN             | 1           | 1.4            | 1           | 0.372        |
| URE            | 0.9         | 1.3            | 0.9         | 0.418        |
| PHO            | 0.7         | 1              | 0.7         | 0.552        |
| Udir           | 0.5         | 0.7            | 0.5         | 0.658        |
| Udif           | 0.2         | 0.3            | 0.2         | 0.906        |

**Table S5.** The SEM's fitting parameters of forest gaps and closed forests for *L. principis-rupprechtii* Mayr plantations after modification

| Statistics               |                           | Absolute fit index                                               |                                |                                                          |                           | Baseline Comparisons           |                                |                             |                               |
|--------------------------|---------------------------|------------------------------------------------------------------|--------------------------------|----------------------------------------------------------|---------------------------|--------------------------------|--------------------------------|-----------------------------|-------------------------------|
| Fitting Index            | $\chi^2$ test( $\chi^2$ ) | Chi-square/<br>$p$ -value<br>degree of<br>Freedom( $\chi^2/df$ ) | Goodness of Fit<br>Index (GFI) | Root Mean<br>Square Error of<br>Approximation<br>(RMSEA) | Normed<br>Fit Index (NFI) | Comparative Fit<br>Index (CFI) | Incremental Fit<br>Index (IFI) | Relative<br>Fit Index (RFI) | Non-normed<br>Fit Index (TLI) |
|                          | 251.55                    | 3.184                                                            | 0.946                          | 0.021                                                    | 0.957                     | 0.985                          | 0.977                          | 0.827                       | 0.915                         |
| <b>Fitting standards</b> | The smaller the better    | <5                                                               | $\geq 0.80$                    | <0.08                                                    | $\geq 0.80$               | $\geq 0.80$                    | $\geq 0.80$                    | $\geq 0.80$                 | $\geq 0.80$                   |
| <b>Ideal value</b>       | The smaller the better    | <3                                                               | >0.90                          | <0.05                                                    | >0.90                     | >0.90                          | >0.90                          | >0.90                       | >0.90                         |
